# Supplementary material for: A Phase II Study of Arginine Deiminase (ADI-PEG20) in Relapsed/Refractory or Poor-Risk Acute Myeloid Leukemia Patients
Source: PubMed Central journal article supplement (PMC5595917; doi:10.1038/s41598-017-10542-4), 2017-09-12
Supplement: 41598_2017_10542_MOESM1_ESM.pdf [file 41598_2017_10542_MOESM1_ESM.pdf]

## **A Phase II Study of Arginine Deiminase (ADI-PEG20) in Relapsed/Refractory or Poor-Risk Acute Myeloid Leukemia Patients**

Hui-Jen Tsai<sup>1,2,3</sup>, Shih Sheng Jiang<sup>1</sup>, Wen-Chun Hung<sup>1</sup>, Gautam Borthakur<sup>4</sup>, Sheng-Fung Lin<sup>3</sup>, Naveen Pemmaraju<sup>4</sup>, Elias Jabbour<sup>4</sup>, John S.

Bomalaski<sup>5</sup>, Ya-Ping Chen<sup>2</sup>, Hui-Hua Hsiao<sup>3</sup>, Ming-Chung Wang<sup>6</sup>, Ching-Yuan Kuo<sup>6</sup>, Hung Chang<sup>7</sup>, Su-Peng Yeh<sup>8</sup>, Jorge Cortes<sup>4</sup>, Li-Tzong

Chen<sup>1,2,3,9</sup>, Tsai-Yun Chen<sup>2</sup>

**Supplementary Table 1.** FAB subtype, baseline marrow blast percentage and cytogenetic change of the 21 evaluable patients

| CR+SD (N=9) |             |                       | PD (N=12)                           |       |             |                       |                                                               |
|-------------|-------------|-----------------------|-------------------------------------|-------|-------------|-----------------------|---------------------------------------------------------------|
| Cases       | FAB subtype | baseline BM blast (%) | cytogenetic abnormality             | Cases | FAB subtype | baseline BM blast (%) | cytogenetic abnormality                                       |
| 1           | M7          | 58.2                  | +8, +21                             | 3     | M2          | 71                    | normal                                                        |
| 2           | M2          | 9.2                   | normal                              | 4     | M0          | 76.2                  | del(18), -18                                                  |
| 6           | M0          | 70-80                 | 43-47. XX, add(18)                  | 5     | M2          | 58                    | t(8;21)                                                       |
| 9           | M4eo        | 44.6                  | inv(16)                             | 7     | M4          | >90                   | del(15)                                                       |
| 12          | M0          | 64.2                  | +11, +14, +2, +21, add(7)(p22), -12 | 8     | M1          | 81.5                  | der(7;12)                                                     |
| 14          | M0          | 50.8                  | del(9)                              | 10    | M2          | 63.6                  | del(1), -5, -6, -8, -9, add(15, add(16), -18, +21, +6mar(16)) |
| 16          | N/A*        | 59                    | +1. add(1), del(1), add(2), del(3)  | 11    | M1          | 72.8                  | del(1), ad(2), del(5), add(16), -17, -18                      |
| 17          | N/A*        | 34                    | del(6q)                             | 13    | M1          | 89.6                  | del(2), del(5), +6, add(6), +8, -18, idem, +20, -7, add(14)   |
| 18          | N/A*        | 30                    | normal                              | 15    | N/A*        | 46                    | t(1;3), t(1;6), der(3)t(3;10)                                 |
|             |             |                       |                                     | 19    | N/A*        | 15                    | del(13), del(20), +Y                                          |
|             |             |                       |                                     | 20    | N/A*        | 14                    | normal                                                        |
|             |             |                       |                                     | 21    | N/A*        | 26                    | inv(16), del(20)                                              |

|          |  |      |  |  |  |      |  |
|----------|--|------|--|--|--|------|--|
| median** |  | 50.8 |  |  |  | 67.3 |  |
|----------|--|------|--|--|--|------|--|

\*, N/A: not available

\*\* ,  $P= 0.25$  by Wilcoxon Rank Sum Test

## Supplementary Table 2

enriched gene sets in BMMC of Case 1 and Case 2 before ADI-PEG20 versus after ADI-PEG20

| Gene set                                             | nominal p-value | FDR q-value | NES*  | core genes                                                                                                                                                                                                                                                                                                                                      |
|------------------------------------------------------|-----------------|-------------|-------|-------------------------------------------------------------------------------------------------------------------------------------------------------------------------------------------------------------------------------------------------------------------------------------------------------------------------------------------------|
| ROSS_AML_OF_FAB_M7_TYPE                              | <0.001          | <0.001      | -3.08 | DLC1, RHAG, RYR3, GATA2, PLOD2, ITGA2B, KEL, LAPTM4B, TFR2, PROS1, PNMT, MINPP1, DNMT3, ANK1, SERPINI1, TAL1, APOE, DNAJC6, PCDH9, PDLIM5, MYH10, ABCC4, NET1, NEO1, FADS2, UROD, GP1BA, BMP2K, KCNH2, NGFRAP1, CMAS, GATA1, TIMP3, KLF1, HLTF, FHL2, ICAM4, DNAJC9, TPM1, SDPR, MYL4, RDX, CTNBL1, PRUNE, PDCD10, PCCB, APOC1, ZMYND8, ALDH1A1 |
| <a href="#">*JAATINEN_HEMATOP_OIETICSTEM_CELL_UP</a> | <0.001          | <0.001      | -2.58 | MEG3, MPL, SCN3A, <a href="#">GATA2</a> , MYCT1, VWDE, OBSL1, DEPTOR, LAPTM4B, KIAA1211, CYTL1, PDZD2, RBPMS, FAM92A1, CPA3, TANC1, FAM69B, ZBTB8A, MAST4,                                                                                                                                                                                      |

|  |  |  |                                                                                                                                                                                                                                                                                                                                                                                                                                                                                                                                                                                                                                                                                                                                                                                                  |
|--|--|--|--------------------------------------------------------------------------------------------------------------------------------------------------------------------------------------------------------------------------------------------------------------------------------------------------------------------------------------------------------------------------------------------------------------------------------------------------------------------------------------------------------------------------------------------------------------------------------------------------------------------------------------------------------------------------------------------------------------------------------------------------------------------------------------------------|
|  |  |  | ZNF711, KIT, SMARCA1, C11orf95, ZNF521, GNAI1, CBX2, NDN, ANGPT1, SHANK3, SCHIP1, CRISPLD1, TFPI, PTPLA, MAP7, PREX2, CALN1, <a href="#">SEPP1</a> , DPY19L2, HMGA2, TXNRD3, FGD5, FAM171B, CNKSR3, COL24A1, GCSH, LOC100506844, ME3, LIMCH1, SERPING1, FRMD6, KHDRBS3, NKAIN2, ARHGAP22, <a href="#">AKR1C3</a> , <a href="#">SOCS2</a> , ZC3HAV1L, SMAD1, BCAT1, <a href="#">GUCY1A3</a> , CDK6, TRO, <a href="#">CRHBP</a> , GPR126, DDAH1, GATM, RHOBTB1, PDGFC, CD109, <a href="#">NPR3</a> , MEIS1, <a href="#">JUP</a> , ISYNA1, TMEM200A, <a href="#">MEST</a> , ZBED3, FAIM, CD34, PGBD1, MYB, MAP9, PON2, DNMT3B, MBLAC2, TRIP6, PXDN, TMEM5, KDELC1, COL5A1, SLC39A8, PLA2G12A, TRIM24, CHST13, TMEM44, ZNF618, <a href="#">FHL1</a> , HDGFRP3, BEND4, ZNRF1, CCNB1IP1, MYO5C, DPPA4, |
|--|--|--|--------------------------------------------------------------------------------------------------------------------------------------------------------------------------------------------------------------------------------------------------------------------------------------------------------------------------------------------------------------------------------------------------------------------------------------------------------------------------------------------------------------------------------------------------------------------------------------------------------------------------------------------------------------------------------------------------------------------------------------------------------------------------------------------------|

|                              |        |       |       |                                                                                                                                                                                                                                                                                                                                                                                                                          |
|------------------------------|--------|-------|-------|--------------------------------------------------------------------------------------------------------------------------------------------------------------------------------------------------------------------------------------------------------------------------------------------------------------------------------------------------------------------------------------------------------------------------|
|                              |        |       |       | <p>ALG10B, STMN1, TAF1D, PPM1H, GPR125, KDM5B, ATP2C1, ANKRD28, DPY19L4, SRD5A3, DOCK7, PLEKHA5, FAM115A, RDX, ATP6V0A2, TUSC1, CDK2AP1, SCN9A, BIVM, EBPL, PAIP1, GOLIM4, C11orf54, FAM175A, <u>ALDH1A1</u>, PROM1, DTL, TMEM38B, TSPYL5, PRMT5, F2RL1, ZNF165, SLC39A10, BSPRY, WDR17, PAICS, CDK4, TRIM73, FABP5, HSPD1, WBP5, CPT1A, NT5DC2, ANKRD6, PSMB5, SSBP2, TNFRSF21, WASF1, CMAHP, ZNF512B, HOXA9, IGLL1</p> |
| YAGI_AML<br>_FAB_MAR<br>KERS | <0.001 | 0.003 | -2.07 | <p>MYO16, GABRE, DLC1, FGFR3, GAD1, RHAG, PYR3, GATA2, ADAMTS3, TRPC6, PLOD2, ITGA2B, KEL, PBX1, LAPTM4B, PROS1, CFH, LAMA5, CXADR, MAST4, SERPINI1, CDC42BPA, TRPC1, SERPINE2, HERC2P2, PIR, CD200, MYH10, PKIA, NET1,</p>                                                                                                                                                                                              |

|                                                                                       |        |       |       |                                                                                                                                                                                                                                                                                   |
|---------------------------------------------------------------------------------------|--------|-------|-------|-----------------------------------------------------------------------------------------------------------------------------------------------------------------------------------------------------------------------------------------------------------------------------------|
|                                                                                       |        |       |       | ALDH5A1, TRIB2, GP1BA, ULK2, STAC, PKIG, SERPINH1, MLLT11, UBXN8, BAMBI, CAV1, ELOVL6, TIMP3, CLCN4, LDB1, ZBTB16, CD180, BAG2, SNTA1, HDGFRP3, TPM1, DLEU1, MYL4, RFC3, TNFRSF4, FADS1, TFDP2, ACO1, PAQR3, PDCD10, TGM2, FAM20B, PCCB, DDHD2, NAE1, GP9, ZMYND8, ALDH1A1, TBPL1 |
| <a href="#">SCHURING<br/>A_STAT5A<br/>TARGETS<br/>UP</a>                              | <0.001 | 0.005 | -2.02 | GYPB, RHAG, HBE1, ANK1, CD36, LEPR, XK, KLHL29, PIM1, CISH                                                                                                                                                                                                                        |
| <a href="#">REACTOM<br/>E_PLATELE<br/>T_AGGREG<br/>ATION_PLU<br/>G_FORMAT<br/>ION</a> | 0.006  | 0.133 | -1.69 | MPL, GP1BB, ADRA2A, ITGA2B, RAPGEF3, GP1BA, GP5, PTK2, VWF, RAPGEF4, FN1, GP9                                                                                                                                                                                                     |
| <a href="#">REACTOM<br/>E_FORMAT</a>                                                  | 0.038  | 0.197 | -1.56 | TUBB4A, CCT2, TUBA1C, TUBB2B, TUBB6, TUBA1A, CCT3, TUBA1B,                                                                                                                                                                                                                        |

|                                                                |       |       |       |                                                                                                                                                                                                                                                                                      |
|----------------------------------------------------------------|-------|-------|-------|--------------------------------------------------------------------------------------------------------------------------------------------------------------------------------------------------------------------------------------------------------------------------------------|
| <a href="#">ION_OF_TUBULIN_FOLDING_INTERMEDIATES_BY_CCTRIC</a> |       |       |       | TUBB2A, CCT4, TCP1, TUBB3, TUBB4B, CCT6A, CCT7, CCT5                                                                                                                                                                                                                                 |
| HALLMARK_MYC_TARGETS_V2                                        | 0.024 | 0.127 | -1.48 | MYC, NDUFAF4, RCL1, SORD, BYSL, NPM1, GNL3, PA2G4, CDK4, HSPD1, RABEPK, DCTPP1, PLK4, MCM4, NOLC1, PLK1, PRMT3, MRTO4, IPO4, UNG, NIP7, SLC29A2, TBRG4, PUS1, PPAN, SRM, TFB2M, DDX18, TCOF1, WDR74, TMEM97, RRP9, MYBBP1A, UTP20, AIMP2, CBX3, NOP16, PPRC1, WDR43, MPHOSPH10, NOP2 |
| <a href="#">HALLMARK_MYC_TARGETS_V1</a>                        | 0.068 | 0.322 | -1.23 | MYC, IMPDH2, CCT2, APEX1, HSP90AB1, ODC1, NPM1, CCT3, CDC20, HNRNPA1, TFDP1, EIF4E, GNL3, POLD2, GLO1, PA2G4, CDK4, MAD2L1, HSPD1, RAN,                                                                                                                                              |



|  |  |  |                                                                                                                                                                                                                                                                                                                                                                                                                                                                                                                                                                                                                                                                                                                                                             |
|--|--|--|-------------------------------------------------------------------------------------------------------------------------------------------------------------------------------------------------------------------------------------------------------------------------------------------------------------------------------------------------------------------------------------------------------------------------------------------------------------------------------------------------------------------------------------------------------------------------------------------------------------------------------------------------------------------------------------------------------------------------------------------------------------|
|  |  |  | <p>PRM1, SET, RPS3, ACP1, ILF2,<br/>MCM4, NOLC1, IARS, CCT4,<br/>EIF2S1, TOMM70A, HNRNPC,<br/>CDK2, SMARCC1, YWHAQ, TCP1,<br/>GSPT1, YWHAE, ABCE1, RPS6,<br/>G3BP1, RPL14, ORC2, NCBP2,<br/>POLE3, DEK, GNB2L1, HDGF,<br/>SRSF3, HDAC2, ERH, CCT7, SF3B3,<br/>EIF4G2, RSL1D1, EIF3J, PPIA,<br/>CCT5, MCM7, EIF4A1, RPL22,<br/>VDAC3, C1QBP, TRIM28, SRSF7,<br/>SYNCRIP, RPS2, PWP1, RPLP0,<br/>SNRPG, CCNA2, PSMD14, XPO1,<br/>SRM, MRPL9, RFC4, HNRNPR,<br/>DHX15, TUFM, EPRS, DDX18,<br/>SERBP1, BUB3, CANX, KARS,<br/>MCM2, SSB, CAD, PTGES3, RRP9,<br/>PSMA1, PABPC4, RPS10, PSMA4,<br/>SLC25A3, AIMP2, EXOSC7, SSBP1,<br/>PHB2, HNRNPA2B1, DDX21,<br/>H2AFZ, TRA2B, PSMB2, CLNS1A,<br/>CBX3, EIF3B, PRDX3, EEF1B2,<br/>HNRNPU, NME1, NOP16, VDAC1,</p> |
|--|--|--|-------------------------------------------------------------------------------------------------------------------------------------------------------------------------------------------------------------------------------------------------------------------------------------------------------------------------------------------------------------------------------------------------------------------------------------------------------------------------------------------------------------------------------------------------------------------------------------------------------------------------------------------------------------------------------------------------------------------------------------------------------------|

|  |  |  |  |                            |
|--|--|--|--|----------------------------|
|  |  |  |  | USP1, EIF4H, PPM1G, UBE2E1 |
|--|--|--|--|----------------------------|

\*       , the common genes on hematopoietic stem cells

enriched gene sets in BMCC of Case 1 before ADI-PEG20 versus after ADI-PEG20

| Gene set                                | nominal p-value | FDR q-value | NES*  | Core genes                                                                                                                                                                                                                                                                                                                                                                                                          |
|-----------------------------------------|-----------------|-------------|-------|---------------------------------------------------------------------------------------------------------------------------------------------------------------------------------------------------------------------------------------------------------------------------------------------------------------------------------------------------------------------------------------------------------------------|
| <a href="#">ROSS_AML_OF_FAB_M7_TYPE</a> | <0.001          | <0.001      | -3.21 | DLC1, PLOD2, RYR3, LAPTM4B, GATA2, PNMT, ITGA2B, TFR2, RHAG, DNMT3, KEL, STXBP6, PCDH9, PROS1, PDLIM5, SERPINI1, MINPP1, APOE, ANK1, TIMP3, NGFRAP1, NET1, ABCC4, FADS2, TAL1, SLC39A4, DNAJC6, MYH10, GATA1, BMP2K, NEO1, ICAM4, KLF1, KCNH2, CTNBL1, GP1BA, ZMYND8, MYL4, APOC1, SDPR, TPM1, PCCB, HLTF, PTGS1, ARMC8, CMAS, PDCD10, C14orf2, DRAP1, MRPS12, DNAJC9, RDX, UROD, ALDH1A1, PSMD6, PRUNE, SOD1, SQLE |
| <a href="#">KEGG_RIB</a>                | <0.001          | <0.001      | -2.56 | RPL36A, RPL31, RPS3, RPS8,                                                                                                                                                                                                                                                                                                                                                                                          |

|                                                   |        |        |       |                                                                                                                                                                                                                                                                                                                                                                                                                                                                |
|---------------------------------------------------|--------|--------|-------|----------------------------------------------------------------------------------------------------------------------------------------------------------------------------------------------------------------------------------------------------------------------------------------------------------------------------------------------------------------------------------------------------------------------------------------------------------------|
| <a href="#">OSOME</a>                             |        |        |       | RPS24, RPL9, RPS17, RPS3A, RPL12, RPS4X, RPL22L1, RPL7, RPL36, RPS20, RPS6, RPS5, RPL3, RPL10A, RPS18, RPLP0, RPS21, RPL15, RPL29, RPS23, RPL24, RPL37A, MRPL13, RPL14, RPL7A, RPL5, RPS11, RPS26, RPL8, RPL32, RPS2, RPS12, RPL4, RPL41, RPL22, RPL27A, RPS27A, RPL18A, RPS29, RPL35, RPL13A, RPL37, RPL10, RPS9, RPL18, RPSA, RPS4Y1, RPL30, RPS10, RPL13, RPS7, RPS15, RPL23, RPS25, RPS27, RPL19, RPL26, RPL23A, RPL34, RPL11, RPL35A, RPL28, RPL17, RPS19 |
| <a href="#">REACTOME PEPTIDE CHAIN ELONGATION</a> | <0.001 | <0.001 | -2.56 | RPL36A, RPL31, RPS3, RPS8, RPS24, RPL9, RPS17, RPS3A, RPL12, EEF2, RPS4X, RPL7, RPL36, RPS20, RPS6, RPS5, RPL3, RPL10A, RPS18, RPLP0, RPS21, RPL15, RPL29, RPS23, RPL24, RPL37A, RPL14, RPL7A, RPL5, RPS11, RPS26, RPL8, RPL32, RPS2, RPS12,                                                                                                                                                                                                                   |

|                                                  |        |        |       |                                                                                                                                                                                                                                                                                                                                                                                                                           |
|--------------------------------------------------|--------|--------|-------|---------------------------------------------------------------------------------------------------------------------------------------------------------------------------------------------------------------------------------------------------------------------------------------------------------------------------------------------------------------------------------------------------------------------------|
|                                                  |        |        |       | RPL4, RPL41, RPL22, RPL27A, RPS27A, RPL18A, RPS29, RPL35, RPL13A, RPL37, RPL10, RPS14, RPS9, RPL18, RPSA, RPS4Y1, RPL30, RPS10, RPL13, RPS7, RPS15, RPL23, RPS25, RPS27, RPL19, RPL26, EEF1A1, RPL23A, RPSAP9, RPL34, RPL11, RPL35A, RPL28, RPL17, RPL19                                                                                                                                                                  |
| REACTOME_3_UTR_MEDIATED_TRANSLATIONAL_REGULATION | <0.001 | <0.001 | -2.53 | RPL36A, RPL31, RPS3, RPS8, RPS24, RPL9, RPS17, RPS3A, RPL12, EIF3E, RPS4X, RPL7, RPL36, RPS20, RPS6, RPS5, RPL3, RPL10A, RPS18, RPLP0, EIF3D, RPS21, RPL15, EIF3C, RPL29, RPS23, RPL24, RPL37A, RPL14, RPL7A, RPL5, RPS11, RPS26, RPL8, RPL32, RPS2, RPS12, RPL4, EIF3H, RPL41, EIF3B, RPL22, RPL27A, RPS27A, RPL18A, RPS29, EIF4G1, RPL35, RPL13A, RPL37, RPL10, RPS14, RPS9, RPL18, EIF1AX, RPSA, EIF3J, RPS4Y1, RPL30, |

|                                                                            |        |        |       |                                                                                                                                                                                                                                                 |
|----------------------------------------------------------------------------|--------|--------|-------|-------------------------------------------------------------------------------------------------------------------------------------------------------------------------------------------------------------------------------------------------|
|                                                                            |        |        |       | RPS10, RPL13, EIF3F, RPS7, RPS15, RPL23, RPS25, RPS27, RPL19, EIF4A1, RPL26, RPL23A, RPSAP9, RPL34, EIF4E, RPL11, RPL35A, RPL28, RPL17, RPS19, RPL6, EIF4B                                                                                      |
| REACTOME_FORMATION_OF_THE_TERNARY_COMPLEX_AND_SUBSEQUENTLY_THE_43S_COMPLEX | <0.001 | <0.001 | -2.39 | RPS3, RPS8, RPS24, RPS17, RPS3A, EIF3E, RPS4X, RPS20, RPS6, RPS5, RPS18, EIF3D, RPS21, EIF3C, RPS23, RPS11, RPS2, RPS12, EIF3H, EIF3B, RPS27A, RPS29, RPS14, RPS9, EIF1AX, RPSA, EIF3J, RPS4Y1, RPS10, EIF3F, RPS7, RPS15, RPS25, RPS27, RPSAP9 |
| <a href="#">YAGI_AML_FAB_MAR_KERS</a>                                      | <0.001 | <0.001 | -2.37 | MYO16, GABRE, DLC1, TRPC6, PLOD2, RYR3, LAPTM4B, FGFR3, GAD1, GATA2, ITGA2B, ADAMTS3, PBX1, RHAG, CXADR, KEL, CFH, LAMA5, PROS1, MAST4, CDC42BPA, SERPINI1, TOM1L1,                                                                             |

|                                      |        |        |       |                                                                                                                                                                                                                                                                                                                                              |
|--------------------------------------|--------|--------|-------|----------------------------------------------------------------------------------------------------------------------------------------------------------------------------------------------------------------------------------------------------------------------------------------------------------------------------------------------|
|                                      |        |        |       | HERC2P2, PIR, TIMP3, PKIG, NET1, TRPC1, TRIB2, ULK2, SERPINE2, MYH10, PKIA, ALDH5A1, CLCN4, ZBTB16, SNTA1, LDB1, BAMBI, SERPINH1, GP1BA, UBXN8, ZMYND8, MYL4, ELOVL6, MLLT11, TGM2, CSF2RB, TPM1, PLA2G6, TFDP2, PCCB, FADS1, DDHD2, ACO1, CTSW, HDGFRP3, MORF4L2, FAM20B, PAFAH1B3, PDCD10, TM7SF2, TGIF1, ICAM2, BAG2, CAV1, DRAP1         |
| <a href="#">REACTOME TRANSLATION</a> | <0.001 | <0.001 | -2.33 | RPL36A, RPL31, RPS3, RPS8, EIF4EBP1, RPS24, RPL9, RPS17, RPS3A, EEF1G, RPL12, EIF2B4, EEF2, EIF3E, RPS4X, RPL7, RPL36, RPS20, RPS6, RPS5, RPL3, RPL10A, RPS18, EEF1B2, RPLP0, EIF3D, RPS21, RPL15, EIF3C, RPL29, RPS23, RPL24, RPL37A, RPL14, RPL7A, RPL5, RPS11, RPS26, RPL8, RPL32, RPS2, RPS12, RPL4, EIF3H, RPL41, EIF3B, RPL22, RPL27A, |

|                                         |        |        |       |                                                                                                                                                                                                                                                                                                                                              |
|-----------------------------------------|--------|--------|-------|----------------------------------------------------------------------------------------------------------------------------------------------------------------------------------------------------------------------------------------------------------------------------------------------------------------------------------------------|
|                                         |        |        |       | RPS27A, RPL18A, RPS29, EIF4G1, RPL35, RPL13A, RPL37, RPL10, RPS14, RPS9, RPL18, EIF1AX, RPSA, EIF3J, RPS4Y1, SRP14, RPL30, RPS10, RPL13, EIF3F, RPS7, RPS15, RPL23, RPS25, RPS27, RPL19, EIF4A1, RPL26, EEF1A1, RPL23A, RPSAP9, RPL34, EIF4E, SRPRB, RPL11, RPL35A, EIF5B, ETF1, RPL28, RPL17, DDOST, RPS19                                  |
| <a href="#">HALLMARK MYC TARGETS V1</a> | <0.001 | <0.001 | -2.27 | MYC, IMPDH2, APEX1, NPM1, CCT2, RPS3, HSP90AB1, NME1, TRIM28, CDK4, POLD2, GNB2L1, HNRNPA1, SMARCC1, GNL3, NOLC1, RPS6, RPS5, C1QBP, ILF2, CCT3, NOP56, HDAC2, TCP1, EEF1B2, RPLP0, EIF3D, PHB, SET, SYNCRIP, CCT5, PABPC4, IARS, ACP1, PA2G4, HSPD1, CCT4, RPL14, RUVBL2, SNRPD1, CAD, LSM7, CCT7, YWHAE, NHP2, NOP16, NCBP2, G3BP1, CSTF2, |

|                                                                                 |        |       |       |                                                                                                                                                                                                                                                                                                                                                                                                                                                                                                                                                         |
|---------------------------------------------------------------------------------|--------|-------|-------|---------------------------------------------------------------------------------------------------------------------------------------------------------------------------------------------------------------------------------------------------------------------------------------------------------------------------------------------------------------------------------------------------------------------------------------------------------------------------------------------------------------------------------------------------------|
|                                                                                 |        |       |       | <p>MCM7, SSBP1, AIMP2, PHB2, RPS2, CLNS1A, FBL, ODC1, CDK2, PSMD3, EIF3B, GLO1, RPL22, RAN, SNRPA, LSM2, KPNB1, RSL1D1, TUFM, SNRPD2, RPL18, GSPT1, UBE2E1, EIF1AX, EIF3J, MRPS18B, CYC1, SRSF2, GOT2, TOMM70A, RPS10, SERBP1, SLC25A3, YWHAQ, HDDC2, PRDX4, HNRNPR, MRPL9, PTGES3, MCM2, RANBP1, COPS5, PSMA1, EIF4A1, KARS, ABCE1, RPL34, IFRD1, DDX21, EIF4E, SRSF1, VDAC1, SF3B3, CBX3, SRSF7, SRM, SNRPA1, PWP1, ETF1, SRSF3, DDX18, RNPS1, ORC2, RRP9, PSMA6, EIF4G2, RPL6, SSB, HNRNPC, XPOT, EPRS, PSMD8, TRA2B, MCM4, PPIA, PSMD14, EXOSC7</p> |
| <a href="#">SCHURING</a><br><a href="#">A_STAT5A</a><br><a href="#">TARGETS</a> | <0.001 | 0.001 | -2.22 | <p>RHAG, ANK1, GYPB, CD36, XK, RAC3, LEPR, MAOA, PIM1, HBE1, TRAF4, CISH</p>                                                                                                                                                                                                                                                                                                                                                                                                                                                                            |



|                                                   |        |       |       |                                                                                                                                                                                                                                                                                                                                                            |
|---------------------------------------------------|--------|-------|-------|------------------------------------------------------------------------------------------------------------------------------------------------------------------------------------------------------------------------------------------------------------------------------------------------------------------------------------------------------------|
| <a href="#">UP</a>                                |        |       |       |                                                                                                                                                                                                                                                                                                                                                            |
| <a href="#">KEGG_STEROID_HORMONE_BIOSYNTHESIS</a> | 0.003  | 0.015 | -1.97 | CYP7B1, AKR1C1, AKR1C2, AKR1C3, HSD17B8                                                                                                                                                                                                                                                                                                                    |
| <a href="#">SCHUHMA_CHER_MYC_TARGETS_UP</a>       | <0.001 | 0.024 | -1.95 | MYC, MEST, AK4, PYCR1, IMPDH2, SORD, TARBP1, TMEM97, SLC39A14, FABP5, EBNA1BP2, NME1, FXN, CDK4, RABEPK, POLD2, TFRC, SLC16A1, NOLC1, UCK2, DDX10, TBL3, AHCY, GCSH, PAICS, IARS, PPAT, FKBP4, PEBP1, CAD, DHODH, GRSF1, AIMP2, RRS1, POLR2H, ODC1, FASN, ZNF239, PRDX4, EXOSC2, RANBP1, MRPL3, AUH, ABCE1, DDX21, KIAA0020, RCC1, SRM, BOP1, CTSC, MTHFD1 |
| <a href="#">REACTOME_METABOLISM_OF_R</a>          | <0.001 | 0.032 | -1.9  | RPL36A, EXOSC4, RPL31, RPS3, RPS8, RPS24, MAPK11, RPL9, RPS17, PRMT5, RPS3A, ZFP36L1,                                                                                                                                                                                                                                                                      |

|                    |  |  |                                                                                                                                                                                                                                                                                                                                                                                                                                                                                                                                                                                                                                                                           |
|--------------------|--|--|---------------------------------------------------------------------------------------------------------------------------------------------------------------------------------------------------------------------------------------------------------------------------------------------------------------------------------------------------------------------------------------------------------------------------------------------------------------------------------------------------------------------------------------------------------------------------------------------------------------------------------------------------------------------------|
| <a href="#">NA</a> |  |  | PSMB5, RPL12, CNOT7, NUP43, RPS4X, RPL7, RPL36, TNKS1BP1, RPS20, PAIP1, RPS6, RPS5, GEMIN6, RPL3, RPL10A, RPS18, RPLP0, PSMD6, RPS21, RPL15, NUP35, RPL29, EXOSC6, SEH1L, RPS23, LSM1, RPL24, RPL37A, RPL14, SNUPN, RPL7A, AAAS, RPL5, SNRPD1, RPS11, RPS26, NCBP2, RPL8, RPL32, PSMC2, KHSRP, RPS2, CLNS1A, RPS12, RPL4, PSMD3, RPL41, SNRPE, RPL22, RPL27A, RPS27A, RPL18A, RPS29, EIF4G1, PPP2R2A, RPL35, LSM2, RPL13A, RPL37, RPL10, RPS14, SNRPD2, RPS9, RPL18, UPF3A, RPSA, GEMIN2, NUP153, RPS4Y1, RPL30, RPS10, GEMIN5, SNRPF, RPL13, RQCD1, DCP1B, CNOT10, SMG9, RPS7, RPS15, RPL23, EXOSC2, SMN1, TGS1, RPS25, RPS27, RPL19, PSMA1, EIF4A1, AKT1, NUP62, RPL26, |
|--------------------|--|--|---------------------------------------------------------------------------------------------------------------------------------------------------------------------------------------------------------------------------------------------------------------------------------------------------------------------------------------------------------------------------------------------------------------------------------------------------------------------------------------------------------------------------------------------------------------------------------------------------------------------------------------------------------------------------|

|                                         |        |       |       |                                                                                                                                                                                                                                                                                  |
|-----------------------------------------|--------|-------|-------|----------------------------------------------------------------------------------------------------------------------------------------------------------------------------------------------------------------------------------------------------------------------------------|
|                                         |        |       |       | RPL23A, GEMIN4, NUP93, RPSAP9, RPL34, LSM5, PSMB6, EIF4E, SNRNPB, RPL11, RPL35A, PPP2R1A, ETF1, PSMB7, RPL28, RNPS1, RPL17, UPF3B, HSPB1, RPS19, PSMA6, PHAX, CNOT8, PSME4, RPL6, EIF4B, DDX20, PSMD4, EXOSC3, EXOSC8, PSMD10, PSMD8, EIF4A3, WDR77                              |
| <a href="#">HALLMARK MYC TARGETS V2</a> | <0.001 | 0.004 | -1.87 | MYC, SORD, TMEM97, NPM1, DCTPP1, RCL1, CDK4, PPAN, RABEPK, BYSL, GNL3, NOLC1, NOP56, NDUFAF4, PHB, PES1, UNG, MRTO4, PA2G4, HSPD1, WDR74, FARSA, PUS1, TBRG4, PRMT3, NOP16, IPO4, AIMP2, WDR43, TCOF1, IMP4, GRWD1, MYBBP1A, SLC29A2, PPRC1, TFB2M, NOP2, CBX3, SRM, DDX18, RRP9 |
| <a href="#">REACTOME FORMAT</a>         | 0.009  | 0.046 | -1.83 | TUBB4A, TUBB6, CCT2, TUBA1A, TUBA1C, TUBB2B, CCT3, TCP1,                                                                                                                                                                                                                         |

|                                                                |        |       |       |                                                                                                                                                                                                                                                                                           |
|----------------------------------------------------------------|--------|-------|-------|-------------------------------------------------------------------------------------------------------------------------------------------------------------------------------------------------------------------------------------------------------------------------------------------|
| <a href="#">ION_OF_TUBULIN_FOLDING_INTERMEDIATES_BY_CCTRIC</a> |        |       |       | TUBB2A, CCT5, CCT4, CCT7, CCT8, CCT6A, TUBB3                                                                                                                                                                                                                                              |
| <a href="#">REACTOME_PLATELET_AGGREGATION_PATHWAY</a>          | 0.004  | 0.123 | -1.67 | MPL, GP1BB, ADRA2A, ITGA2B, RAPGEF4, GP1BA, PTK2                                                                                                                                                                                                                                          |
| <a href="#">PID_MYC_ACTIVATION_PATHWAY</a>                     | <0.001 | 0.126 | -1.66 | MYCT1, SERPINI1, MYC, BCAT1, FOSL1, PIM1, POLR3D, NPM1, NME1, CDK4, PDCD10, TP53, TFRC, CCND2, HMGA1, MINA, TAF9, SMAD3, NME2, MTA1, MAX, KAT2A, HSPD1, RUVBL1, BMI1, RUVBL2, TAF4B, CAD, SNAI1, ODC1, SLC2A1, EIF4G1, NBN, ACTL6A, EIF4A1, HSPA4, PMAIP1, EIF4E, PTMA, NCL, RCC1, RPL11, |

|                                                              |        |       |       |                                                                                                                                                                                                                                                                                                                                                                      |
|--------------------------------------------------------------|--------|-------|-------|----------------------------------------------------------------------------------------------------------------------------------------------------------------------------------------------------------------------------------------------------------------------------------------------------------------------------------------------------------------------|
|                                                              |        |       |       | HSP90AA1, DDX18                                                                                                                                                                                                                                                                                                                                                      |
| <a href="#">HALLMAR<br/>K_HEME_M<br/>ETABOLIS<br/>M</a>      | <0.001 | 0.135 | -1.42 | RHAG, KEL, MINPP1, ANK1,<br>GYPB, SLC7A11, SELENBP1,<br>GYPE, XK, TAL1, CLIC2, GATA1,<br>BMP2K, NFE2, ICAM4, SPTA1,<br>KLF1, RAP1GAP, HBD, BCAM,<br>ADD2, MYL4, TRIM58, MBOAT2,<br>SMOX, ABCB6, CA1, MOCOS,<br>FECH, FN3K, TFDP2, UBAC1,<br>MPP1, RCL1, HBQ1                                                                                                         |
| <a href="#">HALLMAR<br/>K_FATTY<br/>ACID_MET<br/>ABOLISM</a> | 0.018  | 0.16  | -1.35 | ACSM3, AADAT, CD36, CEL, BPHL,<br>LTC4S, APEX1, MAOA, ACOT2,<br>MIF, NTHL1, REEP6, CPT1A,<br>EHHADH, GSTZ1, BCKDHB,<br>ALDH3A1, PCBD1, CA2, UROD,<br>ALDH1A1, GRHPR, UGDH, ADSL,<br>CRAT, PPARA, HIBCH, DECR1,<br>ACAA2, ODC1, EPHX1, ECI2,<br>FASN, PRDX6, ELOVL5, HADH,<br>ALAD, SMS, PTPRG, GLUL, NBN,<br>HMGCL, SETD8, ADIPOR2, GCDH,<br>OSTC, AUH, ECHS1, DLST, |

|  |  |  |  |                                                     |
|--|--|--|--|-----------------------------------------------------|
|  |  |  |  | ACADM, ACADS, HSP90AA1,<br>ECH1, GPD2, HMGCS1, CPT2 |
|--|--|--|--|-----------------------------------------------------|

enriched gene sets in BMMC of Case 1 in relapsed status versus after ADI-PEG20 in complete remission status

| Gene set                                | nominal p-value | FDR q-value | NES* | Core genes                                                                                                                                                                                                                                                                                                        |
|-----------------------------------------|-----------------|-------------|------|-------------------------------------------------------------------------------------------------------------------------------------------------------------------------------------------------------------------------------------------------------------------------------------------------------------------|
| <a href="#">ROSS_AML_OF_FAB_M7_TYPE</a> | <0.001          | <0.001      | 3.01 | DLC1, LAPTM4B, RYR3, ITGA2B, PLOD2, RHAG, TFR2, GATA2, APOE, PROS1, STXBP6, MINPP1, SERPINI1, PNMT, KEL, APOC1, NEO1, TIMP3                                                                                                                                                                                       |
| <a href="#">YAGI_AML_FAB_MAR_KERS</a>   | <0.001          | <0.001      | 2.5  | MYO16, GABRE, DLC1, ADAMTS3, TOM1L1, LAPTM4B, RYR3, ITGA2B, PLOD2, FGFR3, GAD1, RHAG, CXADR, GATA2, PROS1, CFH, CDC42BPA, PBX1, SERPINI1, KEL, TRPC1, TRIB2, HERC2P2, PIR, UBXN8, TIMP3, NET1, TUSC3, SERPINE2, TRPC6, ALDH5A1, CLCN4, PKIG, MYH10, PLA2G6, ELOVL6, MLLT11, PKIA, PCCB, LDB1, PAQR3, LAMA5, BAG2, |

|                                                   |        |        |      |                                                                                                                                                                                                                                                                                                                                                                                                                                                                                                               |
|---------------------------------------------------|--------|--------|------|---------------------------------------------------------------------------------------------------------------------------------------------------------------------------------------------------------------------------------------------------------------------------------------------------------------------------------------------------------------------------------------------------------------------------------------------------------------------------------------------------------------|
|                                                   |        |        |      | ULK2, NLRP3, CD200, CSF2RB, ILF2, ALDH1A1, MORF4L2, PDCD10, ACO1, TGM2, NAE1, SERPINH1, ZMYND8, CTSW, FAM20B, RFC3, FADS1                                                                                                                                                                                                                                                                                                                                                                                     |
| <a href="#">HALLMAR<br/>K MYC TA<br/>RGETS V1</a> | <0.001 | <0.001 | 2.19 | MYC, IMPDH2, NPM1, C1QBP, CCT2, APEX1, HSPD1, MAD2L1, EEF1B2, GLO1, SNRPD1, SNRPG, CLNS1A, NME1, CDK4, HNRNPA1, PSMC6, ILF2, HSP90AB1, NDUFAB1, ERH, GNL3, TCP1, ABCE1, TOMM70A, CCT4, VBP1, MRPL9, CCT3, IARS, RSL1D1, EIF4E, AIMP2, CCT5, HDAC2, KPNA2, PSMA2, RPL14, DDX18, RPL34, YWHAQ, EIF3D, EIF1AX, NCBP2, MRPS18B, PSMD14, PSMD8, PWP1, DUT, EPRS, PSMA6, G3BP1, EIF2S1, PPIA, UBE2E1, SRSF1, RAN, SNRPB2, SNRPD2, PHB, LSM7, PRDX3, KARS, UBA2, SET, VDAC3, RPS5, PSMA4, NOLC1, PA2G4, MCM4, SRSF7, |

|                                                    |        |       |      |                                                                                                                                                                                                                                                                                                                                                                                                                                                                      |
|----------------------------------------------------|--------|-------|------|----------------------------------------------------------------------------------------------------------------------------------------------------------------------------------------------------------------------------------------------------------------------------------------------------------------------------------------------------------------------------------------------------------------------------------------------------------------------|
|                                                    |        |       |      | SSBP1, RPL22, CYL1, RPLP0, SMARCC1, GNB2L1, CCNA2, XPOT, CBX3, HSPE1, COPS5, RUVBL2, PPM1G, HDDC2, SERBP1, AP3S1, XRCC6, CDK2, MCM2, POLD2, NOP56, PHB2, SSB, PCNA, DHX15, GSPT1, RRM1, VDAC1, PSMD7, SNRPD3, EIF3B, PRDX4, SLC25A3, PSMA7, CNBP, RPS6, ACP1, DDX21, CANX, SF3B3, EIF2S2, XPO1, ORC2, RFC4, PABPC4, YWHAE, EIF4A1, POLE3, HNRNPC, BUB3, HNRNPR, PSMC4, TRA2B, SRSF2, PSMA1, MCM7, ODC1, STARD7, PSMD1, PSMD3, SRSF3, RAD23B, COX5A, DEK, ETF1, H2AFZ |
| <a href="#">SEKI INFLAMMATOR Y RESPONSE LPS UP</a> | <0.001 | 0.013 | 2.04 | FAM84A, CCL3, CXCL2, IER3, ADAMTS7, CXCL10, EXOC3L4, CSF1, NFKBIZ, NFKBIA, EREG, MAFF, TSLP, CCRL2, RIPK2, SOD2, GBP1                                                                                                                                                                                                                                                                                                                                                |



|                                                              |        |       |   |                                                                                                                                                                                                                                                                                                                                                                                                                                                                                                                                                                                                                                                                                                        |
|--------------------------------------------------------------|--------|-------|---|--------------------------------------------------------------------------------------------------------------------------------------------------------------------------------------------------------------------------------------------------------------------------------------------------------------------------------------------------------------------------------------------------------------------------------------------------------------------------------------------------------------------------------------------------------------------------------------------------------------------------------------------------------------------------------------------------------|
| <a href="#">WONG MIT<br/>OCHONDRI<br/>A_GENE_M<br/>ODULE</a> | <0.001 | 0.017 | 2 | SLC9A2, SLC40A1, MAOA,<br>TRIM45, MRPS33, GCAT, NT5M,<br>MRPL36, MRPL13, COQ3, PCCB,<br>ABCB6, MRPL42, MRPL45, ACAT1,<br>AGMAT, UNG, NDUFS4, SOD2,<br>HSCB, DCTN6, NDUFB4,<br>NDUFAF1, NDUFAB1, MTHFD2,<br>NDUFB1, TOMM70A, ALDH6A1,<br>COX6C, PDHX, MRPL40, PDHB,<br>MRPS30, MRPS36, DECR1, TFAM,<br>UQCRB, MRPS18B, ATP5F1, FH,<br>NIPSNAP1, MTRR, MCCC2,<br>NDUFA7, DLD, DUT, SLC25A32,<br>UQCRQ, SCO1, MRPS17, NME4,<br>MRPL32, KARS, CRYZ, VDAC3,<br>COX7B, MRPL3, ATP5C1, NDUFV2,<br>MRPS28, ATOX1, CYC1, PDK3,<br>ATP5J, CRYZL1, TIMM10, NQO1,<br>MRPL18, NDUFA4, TIMM23,<br>TIMM13, NDUFS3, SEC61G,<br>CPT1A, WARS2, TOMM7, NDUFA5,<br>NDUFA12, COX18, NDUFB6,<br>ECHS1, NDUFA8, MRPL11, MCAT, |
|--------------------------------------------------------------|--------|-------|---|--------------------------------------------------------------------------------------------------------------------------------------------------------------------------------------------------------------------------------------------------------------------------------------------------------------------------------------------------------------------------------------------------------------------------------------------------------------------------------------------------------------------------------------------------------------------------------------------------------------------------------------------------------------------------------------------------------|

|                                                                |        |       |      |                                                                                                                                                                                                                                                                                                  |
|----------------------------------------------------------------|--------|-------|------|--------------------------------------------------------------------------------------------------------------------------------------------------------------------------------------------------------------------------------------------------------------------------------------------------|
|                                                                |        |       |      | ATP6V1E1, ATP5G2, GPX4, COX7A2, COX7C, DAP3, NDUFB3, UQCRFS1, ATP6V1C1, ATP5B, ATP5O, ATP6V1G1, MRPL49, NDUFS8, NDUFB8, NDUFB10, NDUFA6, ATP5I, MRPS15, NDUFB5, NDUFS5, MRPL27, ATP5L, NDUFV1, UQCR10, HSD17B10, PTRH2, VDAC2, COX5A, COX6A1, ATP13A3, AUH, COX7A2L, ATP6V1D, UQCR11, IDH2, SDHB |
| <a href="#">VANASSE<br/>BCL2 TAR<br/>GETS UP</a>               | <0.001 | 0.044 | 1.85 | RELN, RYR2, SLC16A9, MACC1, SERPING1, LIFR                                                                                                                                                                                                                                                       |
| <a href="#">HALLMAR<br/>K_TNFA_SI<br/>GNALING<br/>VIA_NFKB</a> | <0.001 | 0.041 | 1.66 | IL1B, SERPINE1, CXCL2, CXCL3, IER3, CXCL10, EDN1, CSF1, F3, MYC, CCL4, PTGS2, LAMB3, NFKBIA, BCL2A1, DNAJB4, DUSP1, ETS2, G0S2, MAFF, PDLIM5, ZBTB10, TNFAIP6, BTG3, CCRL2, YRDC, RIPK2, KYNU, IL18, SOD2, CXCL11, TNF, CD83,                                                                    |

|                                                |        |       |      |                                                                                                                                                                                                                                                           |
|------------------------------------------------|--------|-------|------|-----------------------------------------------------------------------------------------------------------------------------------------------------------------------------------------------------------------------------------------------------------|
|                                                |        |       |      | STAT5A, PTGER4, SERPINB2, CD69, EGR1, KLF9, ATF3, NAMPT, SGK1, MSC, TRIP10, MARCKS, CCL2                                                                                                                                                                  |
| <a href="#">HALLMARK_MYC_TARGETS_V2</a>        | 0.012  | 0.024 | 1.62 | MYC, NDUFAF4, SORD, NPM1, HSPD1, TMEM97, RABEPK, UNG, CDK4, WDR74, GNL3, AIMP2, IMP4, NIP7, DDX18, FARSA, MPHOSPH10, PHB, RCL1, WDR43, NOLC1, PA2G4, MCM4, MRTO4, CBX3, HSPE1, DCTPP1                                                                     |
| <a href="#">HALLMARK_INFLAMMATORY_RESPONSE</a> | <0.001 | 0.031 | 1.56 | IL1B, SERPINE1, SLC1A2, KCNJ2, DCBLD2, CXCL9, CXCL10, EDN1, CSF1, F3, MYC, ADORA2B, MMP14, ICAM4, NFKBIA, EREG, ITGB8, FFAR2, CALCRL, TNFAIP6, AQP9, CCRL2, MSR1, TLR3, RIPK2, TIMP1, NLRP3, IL18, AHR, RNF144B, ATP2C1, CXCL11, IL10, LAMP3, NM1, PTGER4 |
| <a href="#">HALLMARK_FATTY</a>                 | 0.005  | 0.033 | 1.54 | AADAT, BMPR1B, CEL, MAOA, LTC4S, ACSM3, CD36, G0S2, OSTC,                                                                                                                                                                                                 |

|                                                |       |       |      |                                                                                                                                                                                                                                                                                                                                                                                                                                                                                |
|------------------------------------------------|-------|-------|------|--------------------------------------------------------------------------------------------------------------------------------------------------------------------------------------------------------------------------------------------------------------------------------------------------------------------------------------------------------------------------------------------------------------------------------------------------------------------------------|
| <a href="#">ACID_MET<br/>ABOLISM</a>           |       |       |      | MIF, APEX1, CCDC58, BPHL,<br>PTPRG, UROD, ACOT2, INMT,<br>NBN, NTHL1, EHHADH, ALDH1A1,<br>CA2, HIBCH, PCBD1, PTS, PDHB,<br>DECR1, MDH1, ECI2, FH, ADSL,<br>HMGCS1, DLD, SDHD, HPGD,<br>GRHPR, SMS, CPT2, ACAA2, CRYZ,<br>ACADM, HADHB                                                                                                                                                                                                                                          |
| <a href="#">HALLMAR<br/>K_E2F_TAR<br/>GETS</a> | 0.005 | 0.072 | 1.44 | DSCC1, MYC, LYAR, GINS1, CKS2,<br>WEE1, MAD2L1, PAICS, UNG,<br>NBN, TFRC, NME1, CDK4, HMGB3,<br>CDKN2A, ASF1A, MTHFD2,<br>EXOSC8, NUDT21, RFC3, NUP107,<br>KPNA2, ORC6, HN1, DCK, DUT,<br>POP7, UBE2T, EIF2S1, RFC2,<br>SRSF1, RAN, ZW10, DLGAP5,<br>PPP1R8, CSE1L, CCNB2, DEPDC1,<br>NOLC1, CKS1B, PA2G4, MCM4,<br>NUP205, RAD21, MCM3, DCTPP1,<br>RACGAP1, XRCC6, MCM2, ING3,<br>POLD2, PRKDC, NAA38, NOP56,<br>RPA2, PCNA, STMN1, GSPT1,<br>BUB1B, RPA3, PHF5A, CDK1, SLBP, |

|                                                                 |       |       |      |                                                                                                                                                                                                                                                                                     |
|-----------------------------------------------------------------|-------|-------|------|-------------------------------------------------------------------------------------------------------------------------------------------------------------------------------------------------------------------------------------------------------------------------------------|
|                                                                 |       |       |      | HMMR, PRDX4, SMC6, UBE2S, CDKN3, KIF2C, PLK4, HMGA1, XPO1, RQCD1, BRCA2, ORC2, PTTG1, CDKN2C, IPO7, TRA2B, ANP32E, SRSF2, PNN, MCM7, SSRP1, RAD51AP1, NUP153, RBBP7, TOP2A, CHEK1, MLH1, DEK, H2AFZ, SMC4, TP53, AURKA                                                              |
| <a href="#">HALLMAR<br/>K_IL6_JAK<br/>_STAT3_SIG<br/>NALING</a> | 0.031 | 0.075 | 1.42 | IL1B, CXCL3, CXCL9, CXCL10, CSF1, IL7, PDGFC, CD36, LEPR, TNFRSF12A, IL1R2, PIM1, SOCS1, CSF2RB, CD38, CXCL11, A2M, TNF                                                                                                                                                             |
| <a href="#">HALLMAR<br/>K_HEME_M<br/>ETABOLIS<br/>M</a>         | 0.005 | 0.088 | 1.39 | RHAG, MINPP1, KEL, CLIC2, XK, SELENBP1, SLC7A11, ANK1, ICAM4, TAL1, KLF1, SPTA1, BMP2K, NFE2, CA1, MBOAT2, ABCB6, FECH, BCAM, UROD, GATA1, TFRC, GYPA, RAP1GAP, TSPO2, GMPS, CA2, MPP1, RHCE, ALDH6A1, ABCG2, HBD, TCEA1, GCLC, TMCC2, GYPB, TRIM58, LMO2, UBAC1, CAT, TRAK2, RCL1, |

|                                                |       |       |     |                                                                                                                                                                                          |
|------------------------------------------------|-------|-------|-----|------------------------------------------------------------------------------------------------------------------------------------------------------------------------------------------|
|                                                |       |       |     | BPGM, SMO                                                                                                                                                                                |
| <a href="#">HALLMARK_XENOBIOTIC_METABOLISM</a> | 0.049 | 0.158 | 1.3 | SERPINE1, GAD1, PROS1, AKR1C2, MAOA, G6PC, BCAT1, CASP6, ACOX2, CD36, ETS2, CROT, PDLIM5, AQP9, BPHL, TMEM97, KYNU, AKR1C3, RAP1GAP, ADH5, PYCR1, TPST1, CA2, ENPEP, GSS, JUP, PTS, GCLC |

enriched gene sets in BMMC of Case 2 before ADI-PEG20 versus after ADI-PEG20

| Gene set                                   | nominal p-value | FDR q-value | NES*  | Core genes                                                                                                                  |
|--------------------------------------------|-----------------|-------------|-------|-----------------------------------------------------------------------------------------------------------------------------|
| <a href="#">PID_SYNDROME_CAN_1_PATHWAY</a> | 0.013           | 0.141       | -1.74 | COL4A1, COL16A1, COL5A2, COL8A1, COL12A1, COL14A1, COL1A2, COL3A1, MET, COL6A3, COL5A1, COL7A1, COL4A4, COL8A2              |
| <a href="#">NABA_COLLAGENS</a>             | 0.011           | 0.154       | -1.73 | COL4A1, COL16A1, COL5A2, COL8A1, COL12A1, COL14A1, COL6A5, COL1A2, COL6A6, COL28A1, COL3A1, COL4A2, COL6A3, COL5A1, COL7A1, |

|                                                            |       |       |       |                                                                                                                                                                                                                    |
|------------------------------------------------------------|-------|-------|-------|--------------------------------------------------------------------------------------------------------------------------------------------------------------------------------------------------------------------|
|                                                            |       |       |       | COL4A4, COL8A2, COL19A1,<br>COL4A3, COL26A1, COL24A1                                                                                                                                                               |
| <a href="#">VALK AML<br/>CLUSTER<br/>8</a>                 | 0.015 | 0.267 | -1.73 | GYPA, RHCE, RHD, GYPB, SNCA,<br>ABCG2, TNS1, TAL1, CDH1, ANK1,<br>TSPAN5, PBX1, TRAK2, SELENBP1,<br>ARHGEF12                                                                                                       |
| <a href="#">NAKAYAM<br/>A FGF2 TA<br/>RGETS</a>            | 0.021 | 0.362 | -1.69 | COL4A1, GPT, COL5A2, COL8A1,<br>IGF1, OLFML3, CXCL12, PDGFRB,<br>MSMO1                                                                                                                                             |
| <a href="#">REACTOM<br/>E COLLAG<br/>EN FORMA<br/>TION</a> | 0.021 | 0.265 | -1.65 | COL4A1, COL16A1, COL5A2,<br>ADAMTS2, COL8A1, COL12A1,<br>COL14A1, COL1A2, COL28A1,<br>COL3A1, ADAMTS3, COL4A2,<br>TLL1, COL6A3, COL5A1, COL7A1,<br>PCOLCE, COL4A4, PLOD2,<br>COL8A2, COL19A1, LEPREL1,<br>SERPINH1 |
| <a href="#">HALLMAR<br/>K HEME M<br/>ETABOLIS<br/>M</a>    | 0.015 | 0.346 | -1.35 | CTSE, GYPE, GYPB, RHCE, RHD,<br>GYPB, TSPO2, ACSL6, CA1, AHSP,<br>RHAG, KEL, SNCA, ABCG2, EPB42,<br>TNS1, SPTB, SPTA1, SLC6A9, TAL1,<br>RAP1GAP, MINPP1, ADD2, CPOX,                                               |

|  |  |  |                                                                                                                                                                                                                                                                                                                                                                                                                                                                                                                                                                |
|--|--|--|----------------------------------------------------------------------------------------------------------------------------------------------------------------------------------------------------------------------------------------------------------------------------------------------------------------------------------------------------------------------------------------------------------------------------------------------------------------------------------------------------------------------------------------------------------------|
|  |  |  | <p>TRIM58, PDZK1IP1, ANK1, CA2, ABCB6, HBB, TMCC2, TSPAN5, IGSF3, SLC2A1, HMBS, HBQ1, HBD, TRAK2, SELENBP1, PC, ERMAP, UROD, TFRC, SLC25A37, ARHGEF12, BPGM, ENDOD1, PPOX, HBBP1, DAAM1, PIGQ, ISCA1, SLC11A2, GLRX5, XPO7, HEBP1, GCLC, SLC30A1, ALAD, FAM46C, MARCH8, AGPAT4, EIF2AK1, MFHAS1, EPB41, AQP3, RNF123, RANBP10, BMP2K, E2F2, HBZ, CLCN3, RCL1, HIST1H4C, MGST3, BTRC, BNIP3L, UCP2, ASNS, UBAC1, GYPC, DCUN1D1, CROCCP2, KAT2B, UROS, NUDT4, NFE2, MXI1, NCOA4, OPTN, BTG2, SLC7A11, SLC25A38, HDGF, TCEA1, CAT, CTNS, ALDH6A1, BLVRA, KLF3</p> |
|--|--|--|----------------------------------------------------------------------------------------------------------------------------------------------------------------------------------------------------------------------------------------------------------------------------------------------------------------------------------------------------------------------------------------------------------------------------------------------------------------------------------------------------------------------------------------------------------------|

\*NES: Normalized enrichment score



**Supplementary Table 3.**

enriched gene sets in BMCC of Case 1 and Case 2 before ADI-PEG20 (BMCC1B and BMCC2B) versus 3 non-responders

| Gene set                                 | nominal p-value | FDR q-value | NES* | Core genes                                                                                                                                                                                                                            |
|------------------------------------------|-----------------|-------------|------|---------------------------------------------------------------------------------------------------------------------------------------------------------------------------------------------------------------------------------------|
| <a href="#">ROSS AML OF FAB M7 TYP E</a> | <0.001          | <0.001      | 2.68 | RYR3, RHAG, PCDH9, ANK1, KEL, TFR2, ITGA2B, TAL1, KCNH2, NEO1, PROS1, DLC1, ALDH1A1, MYH10, GP1BA, DNAJC6, KLF1, GATA1, MINPP1, SERPINI1, PNMT, FHL2, APOC1, DNM3, TPM1, PDLIM5, UROD, SDPR, PLOD2, TIMP3, BMP2K, STXBP6, CMAS, ABCC4 |
| <a href="#">YAGI AML FAB MARKERS</a>     | <0.001          | 0.01        | 1.98 | RYR3, RHAG, ADAMTS3, PBX1, KEL, GAD1, PIR, ITGA2B, PROS1, DLC1, CXADR, ALDH1A1, LAMA5, MYH10, GP1BA, SERPINI1, CLCN4, PKIA, CDC42BPA, GP9, TPM1, CAV1, TRIB2, SNTA1, ULK2, TRPC1, PLOD2, ELOVL6,                                      |

|                                                              |       |       |      |                                                                                                                                                                                                                                                      |
|--------------------------------------------------------------|-------|-------|------|------------------------------------------------------------------------------------------------------------------------------------------------------------------------------------------------------------------------------------------------------|
|                                                              |       |       |      | HDGFRP3, NTRK1, CPM, TIMP3, PKIG, CACNA2D2, NR4A2, TGM2, CFH, NCAM1, LAPTM4B, NET1, HERC2P2, CSF2RB, UBXN8, MAST4, RRAS2, LDB1, GATA2, ATXN1, ELL2, SERPINE2, STAT4, FGFR3, TBPL1, RFC3, PDCD10, ANXA5, MED21, F2R, CAST, CD164, DLEU1, ELOVL5, NAE1 |
| <a href="#">OLSSON_E2F3_TARGETS_UP</a>                       | 0.004 | 0.029 | 1.86 | PTGER3, C1orf198, ELF3, AKR1C2, DAG1, ECE1, PVRL1                                                                                                                                                                                                    |
| <a href="#">SCHURINGA_S_TAT5A_TARGETS_UP</a>                 | 0.007 | 0.055 | 1.76 | RHAG, ANK1, XK, CD36, LEPR, VEGFA                                                                                                                                                                                                                    |
| <a href="#">REACTOME_PLATELET_AGGREGATION_PLUG_FORMATION</a> | 0.006 | 0.118 | 1.72 | GP1BB, ITGA2B, PTK2, GP1BA, GP9, ADRA2A, GP5, FN1, VWF, RASGRP1                                                                                                                                                                                      |
| <a href="#">PID_WNT_NON_CANONICAL_PATHWAY</a>                | 0.013 | 0.211 | 1.63 | ROR2, MAPK10, FZD6, DAAM1, FZD5, FZD7                                                                                                                                                                                                                |

|                                                            |       |      |      |                                                                                                                                                                                                                                                                                                                                                                        |
|------------------------------------------------------------|-------|------|------|------------------------------------------------------------------------------------------------------------------------------------------------------------------------------------------------------------------------------------------------------------------------------------------------------------------------------------------------------------------------|
| <a href="#">HALLMARK_T<br/>NFA_SIGNALIN<br/>G_VIA_NFKB</a> | 0.013 | 0.12 | 1.36 | G0S2, CCND1, LAMB3, BMP2, EGR2, TUBB2A, CSF1, CYR61, EGR3, PDLIM5, PPAP2B, PPAP2B, CXCL10, FOSL1, INHBA, CD80, GPR183, TNFRSF9, EGR1, CD83, BIRC3, MARCKS, NR4A2, NR4A1, CLCF1, KYNU, DUSP4, TRIP10, MAFF, SMAD3, VEGFA, BTG1, PTGS2, TNFAIP6, SERPINE1, IFIT2, SLC2A3, PANX1, SOD2, BTG2, RHOB, DUSP2, NAMPT, DNAJB4, CD69, HBEGF, SGK1, IRS2, ID2, YRDC, NR4A3, IL1B |
|------------------------------------------------------------|-------|------|------|------------------------------------------------------------------------------------------------------------------------------------------------------------------------------------------------------------------------------------------------------------------------------------------------------------------------------------------------------------------------|

enriched gene sets in pre-ADI-PEG20 BMMC of 3 non-responders versus 2 responders

| Gene set                              | nominal p-value | FDR q-value | NES*  | core genes                                    |
|---------------------------------------|-----------------|-------------|-------|-----------------------------------------------|
| <a href="#">SCHURING<br/>A_STAT5A</a> | <0.001          | 0.019       | -1.96 | MPO, CEBPA, ELANE, CTSG, TYROBP, CD44, PECAM1 |

|                                                             |        |       |       |                                                                                                                       |
|-------------------------------------------------------------|--------|-------|-------|-----------------------------------------------------------------------------------------------------------------------|
| <a href="#"><u>TARGETS_DN</u></a>                           |        |       |       |                                                                                                                       |
| <a href="#"><u>VALK_AML_CLUSTER_10</u></a>                  | <0.001 | 0.019 | -1.93 | AZU1, MN1, CFD, CHRDL1, SETBP1, LPHN1, RNASE2, RBPMS, SPON1, PPP1R16B, NPDC1, SPTBN1, FLNB, F2RL1, CRIM1, PRKD2, CD22 |
| <a href="#"><u>KAMIKUBO_MYELOID_CEBPA_NETWORK</u></a>       | <0.001 | 0.018 | -1.92 | PRTN3, CEBPA, EMR1, RAB31, LGALS1, CSF2RA, HP, CYBB, IL18                                                             |
| <a href="#"><u>VILIMAS_NOTCH1_TARGETS_DN</u></a>            | 0.011  | 0.123 | -1.73 | MPO, VPREB1, CTSG, CSF2RA, LRRC25, GFI1, CSF3R                                                                        |
| <a href="#"><u>CREIGHTON_AKT1_SIGNALING_VIA_MTOR_UP</u></a> | 0.004  | 0.135 | -1.7  | ARHGEF16, BIK, CYB561, CLDN3, SLC37A1, DDR1, DUSP10, NEU1, TJP3, PRKCD, UBE2M, LASP1, CLSTN1                          |

|                                                         |       |       |       |                                                                                                                 |
|---------------------------------------------------------|-------|-------|-------|-----------------------------------------------------------------------------------------------------------------|
| <a href="#"><u>VALK_AML_WITH_FLT3_ITD</u></a>           | 0.015 | 0.18  | -1.66 | HOXB6, HOXA9, HOXB3, APP, BAHCC1, IL2RA, MMP2, LCT, LGALS3BP, QPRT, TRPC2, MAP1A, TRIM16, GOLGA8A, IL1RAP, PBX3 |
| <a href="#"><u>WEIGEL_OXIDATIVE_STRESS_RESPONSE</u></a> | 0.019 | 0.228 | -1.61 | CDH3, APP, COMT, CASK, POLD1, BAX, IGFBP2, ARHGDIA, ZNF91, NF2, XIAP, DAPK1, ITGA5, CUX1, GNAS, CAPNS1          |
| <a href="#"><u>GENTLES_LEUKEMIC_STEM_CELL_DN</u></a>    | 0.03  | 0.226 | -1.6  | CCNA1, STAR, RNASE3, RNASE2, MS4A3, CSTA                                                                        |

NES\*, Normalized enrichment score
